# Supplementary material for: Expansion of sandhill cranes (Grus canadensis) in east Asia during the non-breeding period
Source: PeerJ. 2019 Aug 30;7:e7545. doi: 10.7717/peerj.7545 (PMC6718156; doi:10.7717/peerj.7545)
Supplement: Raw Data S1 [file peerj-07-7545-s001.xlsx]

## Sheet: 工作表1
ID	Date	Month	Year	Amount	Type	latitude	longitute	subadult	juvenile	Family	Mix	MixedWith
1	1963	NA	1963	1	Crane Park Izumi	31.5499	130.56	NA	NA	NA	NA	NA
2	1970-01-18	1	1969	1	Paper	42.9849	144.381	0	1	0	1	red-crowned crane
3	1971/1/NA	1	1970	1	Paper	32.8131	119.896	NA	NA	0	NA	NA
4	1973	NA	1973	1	Crane Park Izumi	31.5499	130.56	NA	NA	NA	NA	NA
5	1975	NA	1975	1	Crane Park Izumi	31.5499	130.56	NA	NA	NA	NA	NA
6	1977	NA	1977	1	Crane Park Izumi	31.5499	130.56	NA	NA	NA	NA	NA
7	1979/1/NA	1	1978	1	Paper	34	118	NA	NA	0	NA	NA
8	1979	NA	1979	1	Crane Park Izumi	31.5499	130.56	NA	NA	NA	NA	NA
9	1980	NA	1980	2	Crane Park Izumi	31.5499	130.56	NA	NA	NA	NA	NA
10	1982	NA	1982	4	Crane Park Izumi	31.5499	130.56	NA	NA	NA	NA	NA
11	1983	NA	1983	2	Crane Park Izumi	31.5499	130.56	NA	NA	NA	NA	NA
12	1985-02-14	2	1984	1	Paper	28.8101	116.487	0	1	0	1	siberian crane
13	1986/NA/NA	NA	1986	NA	Paper	28.8101	116.487	NA	NA	NA	NA	NA
14	1987	NA	1987	1	Crane Park Izumi	31.5499	130.56	NA	NA	NA	NA	NA
15	1988	NA	1988	1	Crane Park Izumi	31.5499	130.56	NA	NA	NA	NA	NA
16	1989	NA	1989	2	Crane Park Izumi	31.5499	130.56	NA	NA	NA	NA	NA
17	1990/NA/NA	NA	1990	NA	Paper	37.7995	119.117	NA	NA	NA	NA	NA
18	1990	NA	1990	1	Crane Park Izumi	31.5499	130.56	NA	NA	NA	NA	NA
19	1991	NA	1991	3	Crane Park Izumi	31.5499	130.56	NA	NA	NA	NA	NA
20	1992	NA	1992	5	Crane Park Izumi	31.5499	130.56	NA	NA	NA	NA	NA
21	1993	NA	1993	2	Crane Park Izumi	31.5499	130.56	NA	NA	NA	NA	NA
22	1994-01-22	1	1993	1	GBIF	32.1338	130.353	NA	NA	NA	NA	NA
23	1994-01-21	1	1993	1	GBIF	32.1338	130.353	NA	NA	NA	NA	NA
24	1994	NA	1994	3	Crane Park Izumi	31.5499	130.56	NA	NA	NA	NA	NA
25	1995	NA	1995	1	Crane Park Izumi	31.5499	130.56	NA	NA	NA	NA	NA
26	1997	NA	1997	1	Crane Park Izumi	31.5499	130.56	NA	NA	NA	NA	NA
27	1998	NA	1998	1	Crane Park Izumi	31.5499	130.56	NA	NA	NA	NA	NA
28	1999-11-11	11	1999	NA	News	34.9144	113.652	NA	NA	NA	NA	NA
29	1999	NA	1999	1	Crane Park Izumi	31.5499	130.56	NA	NA	NA	NA	NA
30	2000-01-17	1	1999	1	GBIF	32.103	130.275	NA	NA	NA	NA	NA
31	2000-12-10	12	2000	NA	GBIF	32.103	130.275	NA	NA	NA	NA	NA
32	2000	NA	2000	2	Crane Park Izumi	31.5499	130.56	NA	NA	NA	NA	NA
33	2001	NA	2001	2	Crane Park Izumi	31.5499	130.56	NA	NA	NA	NA	NA
34	2002-02-11	2	2001	NA	GBIF	32.103	130.275	NA	NA	NA	NA	NA
35	2002	NA	2002	2	Crane Park Izumi	31.5499	130.56	NA	NA	NA	NA	NA
36	2003-04-27	4	2002	5	Paper	47.1849	124.555	0	0	0	1	hooded crane
37	2003/12/NA	12	2003	NA	Paper	28.8101	116.487	NA	NA	NA	NA	NA
38	2003	NA	2003	3	Crane Park Izumi	31.5499	130.56	NA	NA	NA	NA	NA
39	2004-01-27	1	2003	NA	GBIF	32.0946	130.353	NA	NA	NA	NA	NA
40	2004-02-01	2	2003	2	GBIF	32.103	130.275	NA	NA	NA	NA	NA
41	2004-12-06	12	2004	1	GBIF	32.103	130.275	NA	NA	NA	NA	NA
42	2004-09-01	9	2004	NA	News	31.1978	121.71	NA	NA	NA	NA	NA
43	2004-03-13	3	2004	NA	News	31.0045	121.871	NA	NA	NA	NA	NA
44	2004	NA	2004	3	Crane Park Izumi	31.5499	130.56	NA	NA	NA	NA	NA
45	2005-01-08	1	2004	3	GBIF	32.103	130.275	NA	NA	NA	NA	NA
46	2005-12-06	12	2005	NA	GBIF	36.6409	126.42	NA	NA	NA	NA	NA
47	2005	NA	2005	4	Crane Park Izumi	31.5499	130.56	NA	NA	NA	NA	NA
48	2006-02-24	2	2005	1	Paper	31.5104	121.96	NA	NA	0	1	hooded & common crane
49	2006-03-16	3	2005	1	News	34.8855	127.51	0	0	0	1	hooded & white-naped crane
50	2006-04-02	4	2005	NA	News	32.1024	118.73	NA	NA	NA	NA	NA
51	2006-03-18	3	2005	NA	News	31.5104	121.96	NA	NA	NA	NA	NA
52	2006-03-13	3	2005	NA	News	31.5104	121.96	NA	NA	NA	NA	NA
53	2006-02-24	2	2005	1	News	31.5104	121.96	NA	NA	NA	NA	NA
54	2006/11/NA	11	2006	1	Paper	37.7995	119.117	0	0	0	1	common crane
55	2006	NA	2006	3	Crane Park Izumi	31.5499	130.56	NA	NA	NA	NA	NA
56	2007	NA	2007	2	Crane Park Izumi	31.5499	130.56	NA	NA	NA	NA	NA
57	2008-01-13	1	2007	1	GBIF	32.103	130.275	NA	NA	NA	NA	NA
58	2008-01-04	1	2007	2	GBIF	32.103	130.275	NA	NA	NA	NA	NA
59	2008-01-04	1	2007	NA	GBIF	32.1039	130.274	NA	NA	NA	NA	NA
60	2008-12-28	12	2008	1	GBIF	32.1029	130.292	NA	NA	NA	NA	NA
61	2008-09-20	9	2008	1	Paper	47.1849	124.555	NA	NA	0	1	hooded crane
62	2008	NA	2008	12	Crane Park Izumi	31.5499	130.56	NA	NA	NA	NA	NA
63	2009-02-25	2	2008	4	GBIF	32.1029	130.275	NA	NA	NA	NA	NA
64	2009-02-23	2	2008	1	GBIF	32.103	130.275	NA	NA	NA	NA	NA
65	2009-02-09	2	2008	3	GBIF	32.103	130.275	NA	NA	NA	NA	NA
66	2008/12/NA	12	2008	1	Field	32.8131	119.896	NA	NA	NA	NA	NA
67	2009-02-15	2	2008	1	News	31.5499	130.56	0	0	0	1	hooded crane
68	2009-09-18	9	2009	1	Field	48.313	129.573	0	0	0	1	hooded crane
69	2009-12-05	12	2009	3	News	32.8131	119.896	NA	NA	NA	NA	NA
70	2009-11-23	11	2009	2	News	32.8131	119.896	NA	NA	NA	NA	NA
71	2009	NA	2009	9	Crane Park Izumi	31.5499	130.56	NA	NA	NA	NA	NA
72	2010-02-25	2	2009	2	GBIF	32.103	130.275	NA	NA	NA	NA	NA
73	2010-01-22	1	2009	NA	GBIF	32.103	130.275	NA	NA	NA	NA	NA
74	2010-02-08	2	2009	NA	GBIF	32.103	130.275	NA	NA	NA	NA	NA
75	2010-05-06	5	2009	1	Paper	45.7069	123.45	0	0	0	1	siberian crane
76	2010-05-27	5	2009	NA	News	48.3229	129.593	NA	NA	NA	NA	NA
77	2010-01-16	1	2009	1	News	32.8131	119.896	NA	NA	NA	NA	NA
78	2010-01-14	1	2009	6	News	32.8131	119.896	NA	NA	NA	NA	NA
79	2010-01-01	1	2009	1	Field	32.8131	119.896	NA	NA	NA	NA	NA
80	2010-01-01	1	2009	NA	News	31.0045	121.871	NA	NA	NA	NA	NA
81	2010-01-01	1	2009	NA	News	31.0045	121.871	NA	NA	NA	NA	NA
82	2010-01-26	1	2009	2	News	31.5499	130.56	0	0	0	NA	NA
83	2010-11-01	11	2010	4	GBIF	32.0789	130.27	NA	NA	NA	NA	NA
84	2010-12-28	12	2010	1	GBIF	33.5826	120.377	NA	NA	NA	NA	NA
85	2010-12-27	12	2010	2	GBIF	33.5826	120.377	NA	NA	NA	NA	NA
86	2010/NA/NA	NA	2010	5	Paper	32.8131	119.896	NA	NA	NA	NA	NA
87	2010/NA/NA	NA	2010	1	Paper	31.5104	121.96	NA	NA	0	NA	NA
88	2010-12-27	12	2010	4	News	32.8131	119.896	NA	NA	NA	NA	NA
89	2010-12-25	12	2010	1	News	31.5104	121.96	NA	NA	NA	NA	NA
90	2010-12-08	12	2010	2	News	32.8131	119.896	NA	NA	NA	NA	NA
91	2010-11-23	11	2010	1	News	31.5104	121.96	NA	NA	NA	NA	NA
92	2010-11-11	11	2010	1	News	34.8988	113.904	NA	NA	NA	NA	NA
93	2010	NA	2010	7	Crane Park Izumi	31.5499	130.56	NA	NA	NA	NA	NA
94	2010-02-24	2	2009	3	Field	31.5499	130.56	0	0	NA	1	hooded & white-naped crane
95	2011-02-26	2	2010	2	News	32.8131	119.896	NA	NA	NA	NA	NA
96	2011-02-19	2	2010	3	News	33.7682	120.259	NA	NA	NA	NA	NA
97	2011-11-19	11	2011	NA	GBIF	31.508	121.962	NA	NA	NA	NA	NA
98	2011/NA/NA	NA	2011	5	Paper	32.8131	119.896	NA	NA	NA	NA	NA
99	2011/NA/NA	NA	2011	1	Paper	31.5104	121.96	NA	NA	0	NA	NA
100	2011-10-31	10	2011	1	Paper	45.7069	123.45	NA	NA	0	1	siberian crane
101	2011-10-26	10	2011	1	Field	47.3324	124.287	0	0	0	1	hooded crane
102	2011-12-13	12	2011	1	News	32.8131	119.896	NA	NA	NA	NA	NA
103	2011	NA	2011	3	Crane Park Izumi	31.5499	130.56	NA	NA	NA	NA	NA
104	2012-03-18	3	2011	1	GBIF	38.2739	127.191	NA	NA	NA	NA	NA
105	2012-02-07	2	2011	1	Field	32.8131	119.896	0	0	NA	1	red-crowned crane
106	2012-04-21	4	2011	1	News	36.283	140.503	0	0	0	NA	NA
107	2012-04-20	4	2011	1	News	36.283	140.503	0	1	0	NA	NA
108	2012-12-12	12	2012	12	GBIF	32.103	130.275	NA	NA	NA	NA	NA
109	2012/NA/NA	NA	2012	5	Paper	32.8131	119.896	NA	NA	NA	NA	NA
110	2012/NA/NA	NA	2012	1	Paper	31.5104	121.96	NA	NA	0	NA	NA
111	2012-12-03	12	2012	2	Field	32.8131	119.896	NA	NA	0	1	red-crowned & common crane
112	2012-11-21	11	2012	NA	News	38.1415	127.304	0	0	0	1	white-naped crane
113	2012-11-12	11	2012	2	News	32.8131	119.896	NA	NA	NA	NA	NA
114	2012-11-08	11	2012	2	News	32.8131	119.896	NA	NA	NA	NA	NA
115	2012-12-06	12	2012	1	News	31.0045	121.871	NA	NA	NA	NA	NA
116	2012	NA	2012	12	Crane Park Izumi	31.5499	130.56	NA	NA	NA	NA	NA
117	2013-02-14	2	2012	NA	GBIF	32.103	130.275	NA	NA	NA	NA	NA
118	2013-02-09	2	2012	7	GBIF	32.103	130.275	NA	NA	NA	NA	NA
119	2013-01-12	1	2012	7	GBIF	32.103	130.275	NA	NA	NA	NA	NA
120	2013-01-11	1	2012	7	GBIF	32.103	130.275	NA	NA	NA	NA	NA
121	2013-01-13	1	2012	3	GBIF	32.103	130.275	NA	NA	NA	NA	NA
122	2013-01-12	1	2012	7	GBIF	32.103	130.275	NA	NA	NA	NA	NA
123	2013-01-12	1	2012	NA	GBIF	32.1338	130.353	NA	NA	NA	NA	NA
124	2013-01-13	1	2012	NA	GBIF	32.1338	130.353	NA	NA	NA	NA	NA
125	2013-03-29	3	2012	1	Paper	42.3562	122.951	0	0	0	1	hooded crane
126	2013-01-31	1	2012	1	News	34.7597	119.339	NA	NA	NA	NA	NA
127	2013-01-01	1	2012	1	News	33.7682	120.259	NA	NA	NA	NA	NA
128	2013-02-10	2	2012	1	News	31.5499	130.56	0	0	0	NA	NA
129	2013-01-15	1	2012	11	News	31.5499	130.56	0	0	NA	1	hooded crane
130	2013-01-03	1	2012	2	News	31.5499	130.56	0	0	0	NA	NA
131	2013-12-20	12	2013	3	GBIF	32.103	130.275	NA	NA	NA	NA	NA
132	2013-12-21	12	2013	2	GBIF	32.103	130.275	NA	NA	NA	NA	NA
133	2013-12-21	12	2013	2	GBIF	32.103	130.275	NA	NA	NA	NA	NA
134	2013-12-20	12	2013	3	GBIF	32.103	130.275	NA	NA	NA	NA	NA
135	2013-12-20	12	2013	3	GBIF	32.103	130.275	NA	NA	NA	NA	NA
136	2013-12-21	12	2013	2	GBIF	32.103	130.275	NA	NA	NA	NA	NA
137	2013-12-04	12	2013	4	Field	32.8131	119.896	0&1	NA	1	1	red-crowned, common & hooded crane
138	2013-12-08	12	2013	1	Paper	40.5475	116.947	NA	NA	0	1	common crane
139	2013-11-23	11	2013	1	Field	33.4247	120.956	0	0	0	1	red-crowned & common crane
140	2013-11-03	11	2013	1	News	32.8131	119.896	NA	NA	NA	NA	NA
141	2013	NA	2013	4	Crane Park Izumi	31.5499	130.56	NA	NA	NA	NA	NA
142	2014-01-12	1	2013	1	GBIF	32.103	130.275	NA	NA	NA	NA	NA
143	2014-01-13	1	2013	2	GBIF	32.103	130.275	NA	NA	NA	NA	NA
144	2014-02-23	2	2013	1	GBIF	33.5998	120.508	NA	NA	NA	NA	NA
145	2014-02-14	2	2013	1	GBIF	32.103	130.275	NA	NA	NA	NA	NA
146	2014-01-23	1	2013	2	GBIF	32.103	130.275	NA	NA	NA	NA	NA
147	2014-12-10	12	2014	NA	GBIF	38.2274	127.277	NA	NA	NA	NA	NA
148	2014-11-15	11	2014	4	GBIF	32.1029	130.292	NA	NA	NA	NA	NA
149	2014-12-14	12	2014	1	News	37.3986	118.921	NA	NA	0	1	common crane
150	2014-10-22	10	2014	1	News	39.1831	118.075	0	1	0	1	siberian crane
151	2014-09-30	9	2014	1	Field	47.3298	124.303	0	0	0	1	hooded crane
152	2014-01-16	1	2013	1	Field	31.5499	130.56	0	0	NA	1	hooded & white-naped crane
153	2014-11-07	11	2014	4	News	31.5499	130.56	0&1	NA	1	NA	NA
154	2014	NA	2014	6	Crane Park Izumi	31.5499	130.56	NA	NA	NA	NA	NA
155	2015/1/NA	1	2014	2	Field	33.7682	120.259	NA	NA	NA	NA	NA
156	2015-12-06	12	2015	8	GBIF	32.103	130.275	NA	NA	NA	NA	NA
157	2015-11-29	11	2015	8	GBIF	32.103	130.275	NA	NA	NA	NA	NA
158	2015-11-22	11	2015	8	GBIF	32.103	130.275	NA	NA	NA	NA	NA
159	2015-11-20	11	2015	5	GBIF	32.1029	130.292	NA	NA	NA	NA	NA
160	2015/12/15-31	12	2015	1	Field	30.9458	117.086	0	0	0	1	hooded crane
161	2015-10-03	10	2015	1	Field	47.3057	124.328	0	0	0	1	hooded crane
162	2015	NA	2015	8	Crane Park Izumi	31.5499	130.56	NA	NA	NA	NA	NA
163	2016-03-20	3	2015	NA	GBIF	36.7829	126.466	NA	NA	NA	NA	NA
164	2016-12-01	12	2016	3	News	34.8855	127.51	0	0	0	1	hooded crane
165	2016-12-11	12	2016	1	News	33.4839	120.61	NA	NA	NA	NA	NA
166	2016-12-10	12	2016	1	News	33.6084	120.51	NA	NA	NA	NA	NA
167	2016	NA	2016	3	Crane Park Izumi	31.5499	130.56	NA	NA	NA	NA	NA
168	2017-05-03	5	2016	2	News	34.8855	127.51	NA	NA	0	1	hooded crane
169	2017	NA	2017	7	Crane Park Izumi	31.5499	130.56	NA	NA	NA	NA	NA
0="absence"; 1="presence"; 0&1="family group"; NA="lack data"
